# Supplementary material for: Specification of jaw identity by the Hand2 transcription factor
Source: PubMed Central journal article supplement (PMC4916603; doi:10.1038/srep28405), 2016-06-22
Supplement: srep28405-s1.pdf [file srep28405-s1.pdf]

# Specification of jaw identity by the Hand2 transcription factor

Noriko Funato, Hiroki Kokubo, Masataka Nakamura, Hiromi Yanagisawa, and Yumiko Saga

## Supplementary Information

**Supplementary Table S1. Analysis of the tissue-specific induction of *Hand2* and *Hand1* with the indicated *Cre* driver.**

|                                 | Neural Crest                                                                         |                                                                                      | Bone primordium                                                                        |                                                                                        | Epithelium                                          |
|---------------------------------|--------------------------------------------------------------------------------------|--------------------------------------------------------------------------------------|----------------------------------------------------------------------------------------|----------------------------------------------------------------------------------------|-----------------------------------------------------|
|                                 | <i>Hand2</i> <sup>CAT/+</sup> ;<br><i>Wnt1-Cre</i><br>( <i>Hand2</i> <sup>NC</sup> ) | <i>Hand1</i> <sup>CAT/+</sup> ;<br><i>Wnt1-Cre</i><br>( <i>Hand1</i> <sup>NC</sup> ) | <i>Hand2</i> <sup>CAT/+</sup> ;<br><i>Twist2-Cre</i><br>( <i>Hand2</i> <sup>BP</sup> ) | <i>Hand1</i> <sup>CAT/+</sup> ;<br><i>Twist2-Cre</i><br>( <i>Hand1</i> <sup>BP</sup> ) | <i>Hand2</i> <sup>CAT/+</sup> ;<br><i>KRT14-Cre</i> |
| <b>Neonatal lethality</b>       | +                                                                                    | +                                                                                    | +                                                                                      | -                                                                                      | -                                                   |
|                                 | 100% (7/7)                                                                           | 100% (5/5)                                                                           | 100% (7/7)                                                                             | (n=13)                                                                                 | (n=5)                                               |
| <b>Surface appearance at P1</b> |                                                                                      |                                                                                      |                                                                                        |                                                                                        |                                                     |
| <b>Brachycephaly</b>            | +                                                                                    | +                                                                                    | +                                                                                      | +                                                                                      | -                                                   |
|                                 | 100% (7/7)                                                                           | 100% (5/5)                                                                           | 100% (7/7)                                                                             | 100% (13/13)                                                                           | (n=5)                                               |
| <b>Hypoplastic ears</b>         | +                                                                                    | +                                                                                    | +                                                                                      | -                                                                                      | -                                                   |
|                                 | 100% (7/7)                                                                           | 100% (5/5)                                                                           | 100% (7/7)                                                                             | (n=13)                                                                                 | (n=5)                                               |
| <b>Open eye lids</b>            | +                                                                                    | +                                                                                    | +                                                                                      | +                                                                                      | -                                                   |
|                                 | 100% (7/7)                                                                           | 100% (5/5)                                                                           | 100% (7/7)                                                                             | 100% (13/13)                                                                           | (n=5)                                               |
| <b>Mutant frequency at P1</b>   | 7.7%                                                                                 | 12.8%                                                                                | 21.9%                                                                                  | 20.6%                                                                                  | 20.8%                                               |
|                                 | (11/142)                                                                             | (5/39)                                                                               | (7/32)                                                                                 | (13/63)                                                                                | (5/24)                                              |
| <b>Expected frequency</b>       | 25%                                                                                  | 25%                                                                                  | 25%                                                                                    | 25%                                                                                    | 25%                                                 |

-, no apparent phenotype.

**Supplementary Table S2. The bone phenotypes of the tissue-specific induction of *Hand1* or *Hand2* with the indicated *Cre* driver.**

|                           |                                    | Neural Crest Cells                                                                   |                                                                                      | Bone primordium                                                                        |                                                                                        | Epithelium                                          |       |
|---------------------------|------------------------------------|--------------------------------------------------------------------------------------|--------------------------------------------------------------------------------------|----------------------------------------------------------------------------------------|----------------------------------------------------------------------------------------|-----------------------------------------------------|-------|
|                           |                                    | <i>Hand2</i> <sup>CAT/+</sup> ;<br><i>Wnt1-Cre</i><br>( <i>Hand2</i> <sup>NC</sup> ) | <i>Hand1</i> <sup>CAT/+</sup> ;<br><i>Wnt1-Cre</i><br>( <i>Hand1</i> <sup>NC</sup> ) | <i>Hand2</i> <sup>CAT/+</sup> ;<br><i>Twist2-Cre</i><br>( <i>Hand2</i> <sup>BP</sup> ) | <i>Hand1</i> <sup>CAT/+</sup> ;<br><i>Twist2-Cre</i><br>( <i>Hand1</i> <sup>BP</sup> ) | <i>Hand2</i> <sup>CAT/+</sup> ;<br><i>KRT14-Cre</i> |       |
| <b>Mandibular process</b> | <b>Mandibular bone</b>             | duplication                                                                          | partial                                                                              | partial                                                                                | -                                                                                      | -                                                   |       |
|                           |                                    | 100% (5/5)                                                                           | duplication                                                                          | duplication                                                                            | (n=3)                                                                                  | (n=5)                                               |       |
|                           | <b>mandibular dentary</b>          | hypoplasia                                                                           | hypoplasia                                                                           | hypoplasia                                                                             | hypoplasia                                                                             | -                                                   |       |
|                           |                                    | 100% (5/5)                                                                           | 100% (3/3)                                                                           | 100% (7/7)                                                                             | 100% (3/3)                                                                             | (n=5)                                               |       |
|                           | <b>lower incisor</b>               | duplication                                                                          | -                                                                                    | -                                                                                      | -                                                                                      | -                                                   |       |
|                           |                                    | 100% (5/5)                                                                           | (n=3)                                                                                | (n=7)                                                                                  | (n=3)                                                                                  | (n=5)                                               |       |
|                           | <b>angular process</b>             | hypoplasia                                                                           | -                                                                                    | hypoplasia                                                                             | -                                                                                      | -                                                   |       |
|                           |                                    | 100% (5/5)                                                                           | (n=3)                                                                                | 100% (7/7)                                                                             | (n=3)                                                                                  | (n=5)                                               |       |
|                           | <b>coronoid process</b>            | aplasia                                                                              | -                                                                                    | hypoplasia                                                                             | -                                                                                      | -                                                   |       |
|                           |                                    | 100% (5/5)                                                                           | (n=3)                                                                                | 100% (7/7)                                                                             | (n=3)                                                                                  | (n=5)                                               |       |
|                           | <b>condylar process</b>            | aplasia                                                                              | -                                                                                    | hypoplasia                                                                             | -                                                                                      | -                                                   |       |
|                           |                                    | 100% (5/5)                                                                           | (n=3)                                                                                | 100% (7/7)                                                                             | (n=3)                                                                                  | (n=5)                                               |       |
|                           | <b>Tympanic ring</b>               | aplasia                                                                              | hypoplasia                                                                           | aplasia/<br>hypoplasia                                                                 | hypoplasia                                                                             | -                                                   |       |
|                           |                                    | 100% (5/5)                                                                           | 100% (3/3)                                                                           | 100% (7/7)                                                                             | 100% (3/3)                                                                             | (n=5)                                               |       |
| <b>Gonial bone</b>        | aplasia                            | -                                                                                    | aplasia                                                                              | -                                                                                      | -                                                                                      |                                                     |       |
|                           | 100% (5/5)                         | (n=3)                                                                                | 100% (7/7)                                                                           | (n=3)                                                                                  | (n=5)                                                                                  |                                                     |       |
| <b>Maxillary process</b>  | <b>Maxillary bone</b>              | <b>palatal process of maxilla</b>                                                    | aplasia                                                                              | aplasia                                                                                | aplasia                                                                                | -                                                   | -     |
|                           |                                    |                                                                                      | 100% (5/5)                                                                           | 100% (3/3)                                                                             | 100% (7/7)                                                                             | (n=3)                                               | (n=5) |
|                           | <b>palatal process of palatine</b> | aplasia                                                                              | aplasia                                                                              | aplasia                                                                                | -                                                                                      | -                                                   |       |
|                           |                                    | 100% (5/5)                                                                           | 100% (3/3)                                                                           | 100% (7/7)                                                                             | (n=3)                                                                                  | (n=5)                                               |       |
|                           | <b>frontal process of maxilla</b>  | hypoplasia                                                                           | hypoplasia                                                                           | hypoplasia                                                                             | -                                                                                      | -                                                   |       |
|                           |                                    | 100%(5/5)                                                                            | 100% (3/3)                                                                           | 100% (7/7)                                                                             | (n=3)                                                                                  | (n=5)                                               |       |
|                           | <b>Jugal</b>                       | aplasia                                                                              | hypoplasia                                                                           | aplasia                                                                                | -                                                                                      | -                                                   |       |
|                           |                                    | 100% (5/5)                                                                           | 100% (3/3)                                                                           | 100% (7/7)                                                                             | (n=3)                                                                                  | (n=5)                                               |       |
|                           | <b>Lamina obturans</b>             | aplasia                                                                              | hypoplasia                                                                           | hypoplasia                                                                             | -                                                                                      | -                                                   |       |
|                           |                                    | 100% (5/5)                                                                           | 100% (3/3)                                                                           | 100% (7/7)                                                                             | (n=3)                                                                                  | (n=5)                                               |       |
|                           | <b>Pterygoid bone</b>              | aplasia                                                                              | aplasia                                                                              | hypoplasia                                                                             | hypoplasia                                                                             | -                                                   |       |
|                           |                                    | 100% (5/5)                                                                           | 100% (3/3)                                                                           | 100% (7/7)                                                                             | 100% (3/3)                                                                             | (n=5)                                               |       |
|                           | <b>Temporal bone</b>               | hypoplasia                                                                           | hypoplasia                                                                           | hypoplasia                                                                             | -                                                                                      | -                                                   |       |
|                           |                                    | 100% (5/5)                                                                           | 100% (3/3)                                                                           | 100% (7/7)                                                                             | (n=3)                                                                                  | (n=5)                                               |       |
| <b>Frontonasal</b>        | <b>Premaxilla</b>                  | deformed                                                                             | deformed                                                                             | -                                                                                      | -                                                                                      | -                                                   |       |

|                       |                           |            |            |            |            |       |
|-----------------------|---------------------------|------------|------------|------------|------------|-------|
| <b>process</b>        |                           | (n=5)      | (n=3)      | (n=7)      | (n=3)      | (n=5) |
|                       | <b>upper incisor</b>      | -          | -          | -          | -          | -     |
|                       |                           | (n=5)      | (n=3)      | (n=7)      | (n=3)      | (n=5) |
| <b>Neurocranium</b>   | <b>Presphenoid bone</b>   | aplasia    | aplasia    | hypoplasia | hypoplasia | -     |
|                       |                           | 100% (5/5) | 100% (3/3) | 100% (7/7) | 100% (3/3) | (n=5) |
|                       | <b>Basisphenoid bone</b>  | hypoplasia | hypoplasia | hypoplasia | hypoplasia | -     |
|                       |                           | 100% (5/5) | 100% (3/3) | 100% (7/7) | 100% (3/3) | (n=5) |
|                       | <b>Basioccipital bone</b> | -          | -          | aplasia    | hypoplasia | -     |
|                       |                           | (n=5)      | (n=3)      | 100% (7/7) | 100% (3/3) | (n=5) |
| <b>Calvaria</b>       | <b>Frontal bone</b>       | hypoplasia | hypoplasia | hypoplasia | -          | -     |
|                       |                           | 100% (5/5) | 100% (3/3) | 100% (7/7) | (n=3)      | (n=5) |
|                       | <b>Parietal bone</b>      | -          | -          | -          | -          | -     |
|                       |                           | (n=5)      | (n=3)      | (n=7)      | (n=3)      | (n=5) |
| <b>Second</b>         | <b>Hyoid bone</b>         | -          | hypoplasia | -          | -          | -     |
| <b>branchial arch</b> |                           | (n=5)      | 33% (1/3)  | (n=7)      | (n=3)      | (n=5) |

-, no apparent phenotype by bone staining.

**Supplementary Table S3. Genes with decreased expression in the E11.5 *Hand2*<sup>NC</sup> samples.**

| Fold Change | Gene Symbol          | Gene Title                                                  | Entrez Gene ID |
|-------------|----------------------|-------------------------------------------------------------|----------------|
| 0.0         | <i>Mudeng</i>        | MU-2/AP1M2 domain containing, death-inducing                | 74385          |
| 0.0         | <i>Slc5a5</i>        | solute carrier family 5 (sodium iodide symporter), member 5 | 114479         |
| 0.0         | <i>Cetn1</i>         | centrin 1                                                   | 26369          |
| 0.0         | <i>C87414</i>        | expressed sequence C87414                                   | 381654         |
| 0.0         | <i>4930532I03Rik</i> | RIKEN cDNA 4930532I03 gene                                  | 75833          |
| 0.1         | <i>B230209E15Rik</i> | RIKEN cDNA B230209E15 gene                                  | 319752         |
| 0.1         | <i>Slx1</i>          | Slx-like 1                                                  | 75140          |
| 0.1         | <i>Map4k3</i>        | mitogen-activated protein kinase kinase kinase kinase 3     | 225028         |
| 0.1         | <i>Slc22a29</i>      | solute carrier family 22. member 29                         | 236293         |
| 0.1         | <i>Slco1b2</i>       | solute carrier organic anion transporter family, member 1b2 | 28253          |
| 0.1         | <i>Tnfsf13b</i>      | tumor necrosis factor (ligand) superfamily, member 13b      | 24099          |
| 0.1         | <i>Krtap5-2</i>      | keratin associated protein 5-2                              | 71623          |
| 0.1         | <i>S100a3</i>        | S100 calcium binding protein A3                             | 20197          |
| 0.1         | <i>Calm4</i>         | calmodulin 4                                                | 80796          |
| 0.1         | <i>Mif</i>           | macrophage migration inhibitory factor                      | 17319          |
| 0.1         | <i>Hrh1</i>          | histamine receptor H1                                       | 15465          |
| 0.1         | <i>Prss37</i>        | protease, serine, 37                                        | 67690          |
| 0.1         | <i>Abca14</i>        | ATP-binding cassette, sub-family A (ABC1), member 14        | 67928          |
| 0.1         | <i>1700066J24Rik</i> | RIKEN cDNA 1700066J24 gene                                  | 76992          |
| 0.1         | <i>Gm9999</i>        | predicted gene 9999                                         | 629141         |
| 0.1         | <i>Paqf5</i>         | progesterin and adipoQ receptor family member V             | 74090          |
| 0.1         | <i>Ubqln2</i>        | ubiquilin 2                                                 | 54609          |
| 0.1         | <i>9030405F24Rik</i> | RIKEN cDNA 9030405F24 gene                                  | 74531          |
| 0.1         | <i>C1ra</i>          | complement component 1, r subcomponent A                    | 50909          |
| 0.2         | <i>Tmsb15a</i>       | thymosin beta 15a                                           | 78478          |
| 0.2         | <i>Pcdh12</i>        | protocadherin 12                                            | 53601          |
| 0.2         | <i>Pisd-ps3</i>      | phosphatidylserine decarboxylase, pseudogene 3              | 66776          |
| 0.2         | <i>Sva</i>           | seminal vesicle antigen                                     | 20939          |
| 0.2         | <i>Klkb1</i>         | kallikrein B, plasma 1                                      | 16621          |
| 0.2         | <i>Adam2</i>         | a disintegrin and metallopeptidase domain 2                 | 11495          |
| 0.2         | <i>Mog</i>           | myelin oligodendrocyte glycoprotein                         | 17441          |
| 0.2         | <i>Car8</i>          | carbonic anhydrase 8                                        | 12319          |
| 0.2         | <i>Pank1</i>         | pantothenate kinase 1                                       | 75735          |
| 0.2         | <i>Tdo2</i>          | tryptophan 2,3-dioxygenase                                  | 56720          |
| 0.2         | <i>Impact</i>        | imprinted and ancient                                       | 16210          |
| 0.2         | <i>Ppt1</i>          | palmitoyl-protein thioesterase 1                            | 19063          |
| 0.3         | <i>Amdhd1</i>        | amidohydrolase domain containing 1                          | 71761          |
| 0.3         | <i>Ear4</i>          | eosinophil-associated, ribonuclease A family, member 4      | 53877          |

|     |                             |                                                           |           |
|-----|-----------------------------|-----------------------------------------------------------|-----------|
| 0.3 | <b><i>Ncoa2</i></b>         | nuclear receptor coactivator 2                            | 17978     |
| 0.3 | <b><i>Arhgap4</i></b>       | Rho GTPase activating protein 4                           | 171207    |
| 0.3 | <b><i>Setd6</i></b>         | SET domain containing 6                                   | 66083     |
| 0.3 | <b><i>Rnaset2a</i></b>      | ribonuclease T2A                                          | 100037283 |
| 0.4 | <b><i>4930429F24Rik</i></b> | RIKEN cDNA 4930429F24 gene                                | 74633     |
| 0.4 | <b><i>Tmed6</i></b>         | transmembrane emp24 protein transport domain containing 6 | 66269     |
| 0.4 | <b><i>Stk33</i></b>         | serine/threonine kinase 33                                | 117229    |
| 0.4 | <b><i>2810417H13Rik</i></b> | RIKEN cDNA 2810417H13 gene                                | 68026     |
| 0.4 | <b><i>4930445B03Rik</i></b> | RIKEN cDNA 4930445B03 gene                                | 74867     |
| 0.4 | <b><i>Snn</i></b>           | stannin                                                   | 20621     |
| 0.5 | <b><i>Mc1r</i></b>          | melanocortin 1 receptor                                   | 17199     |
| 0.5 | <b><i>Arf1</i></b>          | ADP-ribosylation factor 1                                 | 11840     |
| 0.5 | <b><i>Map3k6</i></b>        | mitogen-activated protein kinase kinase kinase 6          | 53608     |

---

**Supplementary Table S4. Genes with increased expression in the E11.5 *Hand2*<sup>NC</sup> samples.**

| <b>Fold Change</b> | <b>Gene Symbol</b>          | <b>Gene Title</b>                                         | <b>Entrez Gene ID</b> |
|--------------------|-----------------------------|-----------------------------------------------------------|-----------------------|
| 19.7               | <b><i>Lat2</i></b>          | linker for activation of T cells family, member 2         | 56743                 |
| 18.4               | <b><i>Icos</i></b>          | inducible T cell co-stimulator                            | 54167                 |
| 18.4               | <b><i>Pot1a</i></b>         | protection of telomeres 1A                                | 101185                |
| 14.9               | <b><i>1700015G11Rik</i></b> | RIKEN cDNA 1700015G11 gene                                | 100503036             |
| 14.9               | <b><i>Ccdc7</i></b>         | coiled-coil domain containing 7                           | 74703                 |
| 12.1               | <b><i>Prl7a1</i></b>        | prolactin family 7, subfamily a, member 1                 | 19113                 |
| 11.3               | <b><i>Polr3a</i></b>        | polymerase (RNA) III (DNA directed) polypeptide A         | 218832                |
| 8.6                | <b><i>Apol9a</i></b>        | apolipoprotein L 9a                                       | 223672                |
| 5.7                | <b><i>Casp9</i></b>         | caspase 9                                                 | 12371                 |
| 4.0                | <b><i>Pcgf5</i></b>         | polycomb group ring finger 5                              | 76073                 |
| 3.7                | <b><i>Hand2</i></b>         | heart and neural crest derivatives expressed transcript 2 | 15111                 |
| 3.5                | <b><i>Mrpl47</i></b>        | mitochondrial ribosomal protein L47                       | 74600                 |
| 3.2                | <b><i>Tlr12</i></b>         | toll-like receptor 12                                     | 384059                |
| 3.0                | <b><i>Slc18a1</i></b>       | solute carrier family 18 (vesicular monoamine), member 1  | 110877                |
| 2.8                | <b><i>9130002K18Rik</i></b> | RIKEN cDNA 9130002K18 gene                                | 74554                 |
| 2.5                | <b><i>Fbrs1</i></b>         | fibrosin-like 1                                           | 381668                |
| 2.5                | <b><i>Stx8</i></b>          | syntaxin 8                                                | 55943                 |
| 2.5                | <b><i>Trp53bp1</i></b>      | transformation related protein 53 binding protein 1       | 27223                 |
| 2.1                | <b><i>Dip2b</i></b>         | DIP2 disco-interacting protein 2 homolog B (Drosophila)   | 239667                |
| 2.0                | <b><i>BB163080</i></b>      | expressed sequence BB163080                               | 106459                |

**Supplementary Table S5. Dysregulated transcription factors in E11.5 *Hand2*<sup>NC</sup> embryos.**

| Gene                 | Protein                                                        | OMIM    | Human genetic disease                                                                         | Mutant mice with craniofacial phenotypes                                                          |
|----------------------|----------------------------------------------------------------|---------|-----------------------------------------------------------------------------------------------|---------------------------------------------------------------------------------------------------|
| <b><i>Atf4</i></b>   | activating transcription factor 4                              | *604064 | n.r.                                                                                          | Abnormal neurocranium morphology <sup>1</sup>                                                     |
| <b><i>Dner</i></b>   | delta- and notch-like epidermal growth factor-related receptor | *607299 | n.r.                                                                                          | n.r.                                                                                              |
| <b><i>Fli1</i></b>   | Friend leukemia virus integration 1                            | *193067 | n.r.                                                                                          | n.r.                                                                                              |
| <b><i>Hand2</i></b>  | heart- and neural crest derivatives-expressed 2                | *602407 | n.r.                                                                                          | Small mandible, CP <sup>2</sup>                                                                   |
| <b><i>Hif1a</i></b>  | hypoxia-inducible factor 1, alpha subunit                      | *603348 | n.r.                                                                                          | Absent pharyngeal arch arteries <sup>3</sup>                                                      |
| <b><i>Hoxa5</i></b>  | homeobox A5                                                    | *142952 | n.r.                                                                                          | Delayed ear emergence <sup>4</sup>                                                                |
| <b><i>Hoxb3</i></b>  | homeobox B3                                                    | *142966 | n.r.                                                                                          | n.r.                                                                                              |
| <b><i>Hoxc8</i></b>  | homeobox C8                                                    | *142970 | n.r.                                                                                          | n.r.                                                                                              |
| <b><i>Hoxd1</i></b>  | homeobox D1                                                    | *142987 | Clubfoot<br>Syndactyly                                                                        | Fusion of atlas and occipital bones <sup>5</sup>                                                  |
| <b><i>Meis2</i></b>  | Meis1, mouse, homolog of, 2                                    | *601740 | n.r.                                                                                          | n.r.                                                                                              |
| <b><i>Pbx1</i></b>   | pre-B-cell leukemia transcription factor 1                     | *176310 | Leukemia, acute pre-B-cell                                                                    | Abnormal craniofacial bone morphology,<br>Palatal shelf hypoplasia,<br>Short snout <sup>6,7</sup> |
| <b><i>Phox2b</i></b> | paired-like homeobox 2b                                        | *603851 | Central hypoventilation syndrome                                                              | n.r.                                                                                              |
| <b><i>Rb1cc1</i></b> | RB1-inducible coiled-coil 1                                    | *606837 | n.r.                                                                                          | n.r.                                                                                              |
| <b><i>Rsf1</i></b>   | repressor splicing factor 1                                    | n.r.    | n.r.                                                                                          | n.r.                                                                                              |
| <b><i>Runx1</i></b>  | runt related transcription factor 1                            | *151385 | Leukemia, acute myeloid<br>platelet disorder, familial, with<br>associated myeloid malignancy | n.r.                                                                                              |
| <b><i>Sfmbt2</i></b> | Scm-like protein with 4 MBT domains 2                          | *615392 | n.r.                                                                                          | n.r.                                                                                              |
| <b><i>Six4</i></b>   | sine oculis-related homeobox 4                                 | *606342 | Posterior polar cataract<br>Myocardial stunning                                               | No phenotype <sup>8</sup>                                                                         |

OMIM, Online Mendelian Inheritance in Man (<http://omim.org>); n.r., not reported; CP, cleft palate. The homeobox transcription factors are in green.

**Supplementary Table S6. Genes with decreased expression in E12.5 *Hand2*<sup>NC</sup> samples.**

| Fold Change | Gene Symbol          | Gene Title                                                           | Entrez Gene ID |
|-------------|----------------------|----------------------------------------------------------------------|----------------|
| 0.0         | <i>Ddx3y</i>         | DEAD (Asp-Glu-Ala-Asp) box polypeptide 3, Y-linked                   | 26900          |
| 0.0         | <i>Uty</i>           | ubiquitously transcribed tetratricopeptide repeat gene, Y chromosome | 22290          |
| 0.0         | <i>Eif2s3y</i>       | eukaryotic translation initiation factor 2, subunit 3, Y-linked      | 26908          |
| 0.0         | <i>Chmp4c</i>        | charged multivesicular body protein 4C                               | 66371          |
| 0.0         | <i>Kdm5d</i>         | lysine (K)-specific demethylase 5D                                   | 20592          |
| 0.0         | <i>4933411E06Rik</i> | RIKEN cDNA 4933411E06 gene                                           | 71181          |
| 0.0         | <i>Dhx9</i>          | DEAH (Asp-Glu-Ala-His) box polypeptide 9                             | 13211          |
| 0.1         | <i>A230048O21Rik</i> | RIKEN cDNA A230048O21 gene                                           | 320959         |
| 0.1         | <i>AY702102</i>      | cDNA sequence AY702102                                               | 446211         |
| 0.1         | <i>4930423D22Rik</i> | RIKEN cDNA 4930423D22 gene                                           | 74634          |
| 0.1         | <i>Vmn1r25</i>       | vomer nasal 1 receptor 25                                            | 113865         |
| 0.1         | <i>Mpdz</i>          | multiple PDZ domain protein                                          | 17475          |
| 0.1         | <i>Lingo2</i>        | leucine rich repeat and Ig domain containing 2                       | 242384         |
| 0.1         | <i>4930488N15Rik</i> | RIKEN cDNA 4930488N15 gene                                           | 75032          |
| 0.1         | <i>Pou3f3</i>        | POU domain, class 3, transcription factor 3                          | 18993          |
| 0.1         | <i>Aff4</i>          | AF4/FMR2 family, member 4                                            | 93736          |
| 0.1         | <i>Lipm</i>          | lipase, family member M                                              | 78753          |
| 0.1         | <i>Zfp369</i>        | zinc finger protein 369                                              | 170936         |
| 0.1         | <i>2900042E19Rik</i> | RIKEN cDNA 2900042E19 gene                                           | 72941          |
| 0.1         | <i>Tmem150b</i>      | transmembrane protein 150B                                           | 330460         |
| 0.1         | <i>Cd200r1</i>       | CD200 receptor 1                                                     | 57781          |
| 0.1         | <i>A930012N16Rik</i> | RIKEN cDNA A930012N16 gene                                           | 77813          |
| 0.1         | <i>Bnip2</i>         | BCL2/adenovirus E1B interacting protein 2                            | 12175          |
| 0.1         | <i>6330575P09Rik</i> | RIKEN cDNA 6330575P09 gene                                           | 76196          |
| 0.1         | <i>Lrat</i>          | lecithin-retinol acyltransferase                                     | 79235          |
| 0.1         | <i>Tet1</i>          | tet methylcytosine dioxygenase 1                                     | 52463          |
| 0.2         | <i>Adrbk2</i>        | adrenergic receptor kinase, beta 2                                   | 320129         |
| 0.2         | <i>Timm9</i>         | translocase of inner mitochondrial membrane 9 homolog (yeast)        | 30056          |
| 0.2         | <i>1700126A01Rik</i> | RIKEN cDNA 1700126A01 gene                                           | 73602          |
| 0.2         | <i>Tnn</i>           | tenascin N                                                           | 329278         |
| 0.2         | <i>Adam33</i>        | a disintegrin and metallopeptidase domain 33                         | 110751         |
| 0.2         | <i>Slc18a1</i>       | solute carrier family 18 (vesicular monoamine), member 1             | 110877         |
| 0.2         | <i>Snx6</i>          | sorting nexin 6                                                      | 72183          |
| 0.3         | <i>4931431B13Rik</i> | RIKEN cDNA 4931431B13 gene                                           | 70973          |
| 0.3         | <i>D12Ertd208e</i>   | DNA segment, Chr 12, ERATO Doi 208, expressed                        | 52495          |
| 0.3         | <i>Rit2</i>          | Ras-like without CAAX 2                                              | 19762          |
| 0.3         | <i>Helz</i>          | helicase with zinc finger domain                                     | 78455          |
| 0.3         | <i>Naif1</i>         | nuclear apoptosis inducing factor 1                                  | 71254          |
| 0.3         | <i>Kdm4a</i>         | lysine (K)-specific demethylase 4A                                   | 230674         |
| 0.3         | <i>4831440E17Rik</i> | RIKEN cDNA 4831440E17 gene                                           | 320965         |



|     |                      |                                                               |        |
|-----|----------------------|---------------------------------------------------------------|--------|
| 0.3 | <b>A730009E18Rik</b> | RIKEN cDNA A730009E18 gene                                    | 319603 |
| 0.3 | <b>Aqr</b>           | aquarius                                                      | 11834  |
| 0.3 | <b>Peli1</b>         | pellino 1                                                     | 67245  |
| 0.4 | <b>Alpi</b>          | alkaline phosphatase, intestinal                              | 76768  |
| 0.4 | <b>3110040M04Rik</b> | RIKEN cDNA 3110040M04 gene                                    | 73176  |
| 0.4 | <b>Msr1</b>          | macrophage scavenger receptor 1                               | 20288  |
| 0.4 | <b>Pdx1</b>          | pancreatic and duodenal homeobox 1                            | 18609  |
| 0.4 | <b>Rec8</b>          | REC8 homolog (yeast)                                          | 56739  |
| 0.4 | <b>Eif4g3</b>        | Eukaryotic translation initiation factor 4 gamma, 3           | 230861 |
| 0.4 | <b>Kif20b</b>        | kinesin family member 20B                                     | 240641 |
| 0.4 | <b>Prdm16</b>        | PR domain containing 16                                       | 70673  |
| 0.4 | <b>Rab3c</b>         | RAB3C, member RAS oncogene family                             | 67295  |
| 0.4 | <b>Slc25a29</b>      | solute carrier family 25, member 29                           | 214663 |
| 0.4 | <b>Stat1</b>         | signal transducer and activator of transcription 1            | 20846  |
| 0.4 | <b>Abi3bp</b>        | ABI gene family, member 3 (NESH) binding protein              | 320712 |
| 0.4 | <b>D830026I12Rik</b> | RIKEN cDNA D830026I12 gene                                    | 319682 |
| 0.4 | <b>Gmfb</b>          | glia maturation factor, beta                                  | 63985  |
| 0.4 | <b>Mal</b>           | myelin and lymphocyte protein, T cell differentiation protein | 17153  |
| 0.4 | <b>Mga</b>           | MAX gene associated                                           | 29808  |
| 0.4 | <b>Vamp5</b>         | vesicle-associated membrane protein 5                         | 53620  |
| 0.4 | <b>Wdfy1</b>         | WD repeat and FYVE domain containing 1                        | 69368  |
| 0.5 | <b>1700001P01Rik</b> | RIKEN cDNA 1700001P01 gene                                    | 72215  |
| 0.5 | <b>4922501L14Rik</b> | RIKEN cDNA 4922501L14 gene                                    | 209601 |
| 0.5 | <b>6430711C07Rik</b> | RIKEN cDNA 6430711C07 gene                                    | 76225  |
| 0.5 | <b>A230055J12Rik</b> | RIKEN cDNA A230055J12 gene                                    | 320314 |
| 0.5 | <b>Bach1</b>         | BTB and CNC homology 1                                        | 12013  |
| 0.5 | <b>Hdlbp</b>         | high density lipoprotein (HDL) binding protein                | 110611 |
| 0.5 | <b>Kank2</b>         | KN motif and ankyrin repeat domains 2                         | 235041 |
| 0.5 | <b>Lsm11</b>         | U7 snRNP-specific Sm-like protein LSM11                       | 72290  |
| 0.5 | <b>Nipbl</b>         | Nipped-B homolog (Drosophila)                                 | 71175  |
| 0.5 | <b>Nrcam</b>         | neuron-glia-CAM-related cell adhesion molecule                | 319504 |
| 0.5 | <b>Ociad1</b>        | OCIA domain containing 1                                      | 68095  |
| 0.5 | <b>Rhobtb3</b>       | Rho-related BTB domain containing 3                           | 73296  |
| 0.5 | <b>Zeb2</b>          | zinc finger E-box binding homeobox 2                          | 24136  |
| 0.5 | <b>2010106G01Rik</b> | RIKEN cDNA 2010106G01 gene                                    | 66552  |
| 0.5 | <b>6720422M22Rik</b> | RIKEN cDNA 6720422M22 gene                                    | 99946  |
| 0.5 | <b>Arpp21</b>        | cyclic AMP-regulated phosphoprotein, 21                       | 74100  |
| 0.5 | <b>Atp6v0a1</b>      | ATPase, H+ transporting, lysosomal V0 subunit A1              | 11975  |
| 0.5 | <b>E2f6</b>          | E2F transcription factor 6                                    | 50496  |
| 0.5 | <b>Mef2c</b>         | myocyte enhancer factor 2C                                    | 17260  |
| 0.5 | <b>Nsg2</b>          | neuron specific gene family member 2                          | 18197  |
| 0.5 | <b>Pnpt1</b>         | polyribonucleotide nucleotidyltransferase 1                   | 71701  |
| 0.5 | <b>Ube2b</b>         | ubiquitin-conjugating enzyme E2B                              | 22210  |

The homeobox transcription factors are in green.

## Supplementary Table S7. Genes with increased expression in E12.5 *Hand2*<sup>NC</sup>

samples.

| Fold Change | Gene Symbol          | Gene Title                                                  | Entrez Gene ID |
|-------------|----------------------|-------------------------------------------------------------|----------------|
| 73.5        | <i>Pth</i>           | parathyroid hormone                                         | 19226          |
| 64.0        | <i>AA522020</i>      | expressed sequence AA522020                                 | 103067         |
| 24.3        | <i>Il7</i>           | interleukin 7                                               | 16196          |
| 21.1        | <i>1700007E05Rik</i> | RIKEN cDNA 1700007E05 gene                                  | 114672         |
| 21.1        | <i>Zfp133-ps</i>     | zinc finger protein 133, pseudogene                         | 668917         |
| 19.7        | <i>Hand2</i>         | heart and neural crest derivatives expressed transcript 2   | 15111          |
| 19.7        | <i>Slco1b2</i>       | solute carrier organic anion transporter family, member 1b2 | 28253          |
| 14.9        | <i>1810058N05Rik</i> | RIKEN cDNA 1810058N05 gene                                  | 69808          |
| 14.9        | <i>Ighv14-2</i>      | immunoglobulin heavy variable 14-2                          | 668421         |
| 13.9        | <i>Casp9</i>         | caspase 9                                                   | 12371          |
| 13.9        | <i>Sdr16c6</i>       | short chain dehydrogenase/reductase family 16C, member 6    | 242286         |
| 13.0        | <i>Krt28</i>         | keratin 28                                                  | 70843          |
| 13.0        | <i>Spon1</i>         | spondin 1, (f-spondin) extracellular matrix protein         | 233744         |
| 12.1        | <i>Svs5</i>          | seminal vesicle secretory protein 5                         | 20944          |
| 12.1        | <i>Tnp2</i>          | transition protein 2                                        | 21959          |
| 10.6        | <i>4933429H19Rik</i> | RIKEN cDNA 4933429H19 gene                                  | 71280          |
| 9.8         | <i>Ifna9</i>         | interferon alpha 9                                          | 15972          |
| 9.2         | <i>D14Erd574e</i>    | DNA segment, Chr 14, ERATO Doi 574, expressed               | 52508          |
| 9.2         | <i>Magea1</i>        | melanoma antigen, family A, 1                               | 17137          |
| 9.2         | <i>Pkd1l2</i>        | polycystic kidney disease 1 like 2                          | 76645          |
| 8.6         | <i>C77370</i>        | expressed sequence C77370                                   | 245555         |
| 8.0         | <i>A930002I21Rik</i> | RIKEN cDNA A930002I21 gene                                  | 109226         |
| 8.0         | <i>Astn2</i>         | astrotactin 2                                               | 56079          |
| 8.0         | <i>Cgnl1</i>         | cingulin-like 1                                             | 68178          |
| 7.0         | <i>Amotl1</i>        | angiomin-like 1                                             | 75723          |
| 7.0         | <i>Hmx2</i>          | H6 homeobox 2                                               | 15372          |
| 7.0         | <i>Mcm9</i>          | minichromosome maintenance complex component 9              | 71567          |
| 7.0         | <i>Zfp819</i>        | zinc finger protein 819                                     | 74400          |
| 6.5         | <i>Hist1h1e</i>      | histone cluster 1, H1e                                      | 50709          |
| 6.1         | <i>D530015H24Rik</i> | RIKEN cDNA D530015H24 gene                                  | 78715          |
| 5.7         | <i>Gpat2</i>         | glycerol-3-phosphate acyltransferase 2, mitochondrial       | 215456         |
| 5.3         | <i>Igkv1-135</i>     | immunoglobulin kappa variable 1-135                         | 243420         |
| 4.9         | <i>1700003H04Rik</i> | RIKEN cDNA 1700003H04 gene                                  | 384775         |
| 4.9         | <i>Smr2</i>          | submaxillary gland androgen regulated protein 2             | 20600          |
| 4.6         | <i>Samhd1</i>        | SAM domain and HD domain, 1                                 | 56045          |
| 4.3         | <i>Cbs</i>           | cystathionine beta-synthase                                 | 12411          |
| 4.3         | <i>Hoxc5</i>         | homeobox C5                                                 | 15424          |
| 3.7         | <i>2410018L13Rik</i> | RIKEN cDNA 2410018L13 gene                                  | 245297         |

|     |                             |                                                         |           |
|-----|-----------------------------|---------------------------------------------------------|-----------|
| 3.2 | <b><i>Cx3cr1</i></b>        | chemokine (C-X3-C) receptor 1                           | 13051     |
| 3.2 | <b><i>Nlr5</i></b>          | NLR family, CARD domain containing 5                    | 434341    |
| 3.0 | <b><i>AU020147</i></b>      | expressed sequence AU020147                             | 102226    |
| 2.8 | <b><i>Hsf2</i></b>          | heat shock factor 2                                     | 319253    |
| 2.8 | <b><i>Srcap</i></b>         | Snf2-related CREBBP activator protein                   | 100043597 |
| 2.6 | <b><i>1700023H06Rik</i></b> | RIKEN cDNA 1700023H06 gene                              | 69442     |
| 2.6 | <b><i>lbsp</i></b>          | integrin binding sialoprotein                           | 15891     |
| 2.3 | <b><i>2310058N22Rik</i></b> | RIKEN cDNA 2310058N22 gene                              | 71921     |
| 2.3 | <b><i>Akr1c14</i></b>       | aldo-keto reductase family 1, member C14                | 105387    |
| 2.3 | <b><i>Ccbe1</i></b>         | collagen and calcium binding EGF domains 1              | 320924    |
| 2.3 | <b><i>Gm2083</i></b>        | major urinary protein LOC100048885                      | 100038948 |
| 2.3 | <b><i>Xist</i></b>          | inactive X specific transcripts                         | 213742    |
| 2.1 | <b><i>Abcc9</i></b>         | ATP-binding cassette, sub-family C (CFTR/MRP), member 9 | 20928     |
| 2.1 | <b><i>Baiap3</i></b>        | BAI1-associated protein 3                               | 545192    |
| 2.1 | <b><i>Hoxd4</i></b>         | homeobox D4                                             | 15436     |
| 2.1 | <b><i>Meg3</i></b>          | maternally expressed 3                                  | 17263     |
| 2.1 | <b><i>Otud5</i></b>         | OTU domain containing 5                                 | 54644     |
| 2.1 | <b><i>S100a8</i></b>        | S100 calcium binding protein A8 (calgranulin A)         | 20201     |
| 2.0 | <b><i>Gm13242</i></b>       | predicted gene 13242                                    | 100041379 |
| 2.0 | <b><i>Gsc</i></b>           | goosecoid homeobox                                      | 14836     |
| 2.0 | <b><i>Ngp</i></b>           | neutrophilic granule protein                            | 18054     |
| 2.0 | <b><i>Slc10a6</i></b>       | solute carrier family 10, member 6                      | 75750     |
| 2.0 | <b><i>Zfp386</i></b>        | zinc finger protein 386 (Kruppel-like)                  | 56220     |

---

The homeobox transcription factors are in green.

**Supplementary Table S8. Dysregulated homeobox transcription factors in E12.5 *Hand2<sup>NC</sup>* heads.**

| Gene                         | Protein                                           | OMIM    | Human genetic disease                                                                                                                             | Mutant mice with craniofacial phenotypes                                                 |
|------------------------------|---------------------------------------------------|---------|---------------------------------------------------------------------------------------------------------------------------------------------------|------------------------------------------------------------------------------------------|
| <i>Aix3</i>                  | aristaless-like homeobox 3                        | *606014 | Frontonasal dysplasia 1<br>CL/P                                                                                                                   | Facial cleft <sup>9,10</sup>                                                             |
| <i>Cux1/</i><br><i>Cutl1</i> | CUT-like 1                                        | *116896 | n.r.                                                                                                                                              | n.r.                                                                                     |
| <i>Gsc</i>                   | goosecoid homeobox                                | *138890 | Miller Fisher syndrome<br>Auditory neuropathy<br>short stature, auditory canal atresia,<br>mandibular hypoplasia, skeletal<br>abnormalities       | Abnormal craniofacial morphology <sup>11,12</sup>                                        |
| <i>Hmx1</i>                  | H6 family homeobox 1                              | *142992 | Oculoauricular syndrome, coloboma                                                                                                                 | Cranial abnormalities <sup>13</sup>                                                      |
| <i>Hmx2</i>                  | H6 family homeobox 2                              | *600647 | Peripartum cardiomyopathy, split<br>foot                                                                                                          | Abnormal inner ear morphology <sup>14</sup>                                              |
| <i>Hoxa4</i>                 | homeobox A4                                       | *142953 | Megacolon, abdominal aortic<br>aneurysm                                                                                                           | n.r.                                                                                     |
| <i>Hoxa5</i>                 | homeobox A5                                       | *142952 | n.r.                                                                                                                                              | Delayed ear emergence <sup>4</sup>                                                       |
| <i>Hoxc4</i>                 | homeobox C4                                       | *142974 | n.r.                                                                                                                                              | n.r.                                                                                     |
| <i>Hoxc5</i>                 | homeobox C5                                       | *142973 | n.r.                                                                                                                                              | n.r.                                                                                     |
| <i>Hoxd1</i>                 | homeobox D1                                       | *142987 | clubfoot, syndactyly                                                                                                                              | Fusion of atlas and occipital bones <sup>5</sup>                                         |
| <i>Hoxd4</i>                 | homeobox D4                                       | *142981 | n.r.                                                                                                                                              | n.r.                                                                                     |
| <i>Irx5</i>                  | Iroquois homeobox protein 5                       | *606195 | Hamamy syndrome<br>sensorineural hearing loss                                                                                                     | n.r.                                                                                     |
| <i>Isl1</i>                  | Isl LIM homeobox 1                                | *600366 | n.r.                                                                                                                                              | Abnormal pharyngeal arch morphology <sup>15</sup>                                        |
| <i>Lhx8</i>                  | LIM homeobox gene 8                               | *604425 | Nonsyndromic CP                                                                                                                                   | CP <sup>16</sup>                                                                         |
| <i>Pax3</i>                  | paired box gene 3                                 | *606597 | Waardenburg syndrome, type I<br>Waardenburg syndrome, type III<br>Craniofacial-deafness-hand<br>syndrome<br>alveolar rhabdomyosarcoma<br>CL/P, CP | n.r.                                                                                     |
| <i>Pax9</i>                  | paired box gene 9                                 | *167416 | Tooth agenesis, selective, 3                                                                                                                      | CP, absent teeth, absent premaxilla,<br>absent alveolar process <sup>17,18</sup>         |
| <i>Pdx1</i>                  | pancreatic and duodenal<br>homeobox1              | *600733 | Maturity-onset diabetes of the<br>young, type IV<br>Pancreatic agenesis<br>Diabetes mellitus, type II,                                            | n.r.                                                                                     |
| <i>Phox2b</i>                | paired-like homeobox 2b                           | *603851 | Central hypoventilation syndrome                                                                                                                  | n.r.                                                                                     |
| <i>Pitx1</i>                 | paired-like homeodomain<br>transcription factor 1 | *602149 | Clubfoot, congenital, with or without<br>deficiency of long bones and/or                                                                          | CP, decrease tongue size, absent<br>submandibular gland, small mandible <sup>19,20</sup> |

|               |                           |         |                             |                                                                                                                                 |
|---------------|---------------------------|---------|-----------------------------|---------------------------------------------------------------------------------------------------------------------------------|
|               |                           |         | mirror-image polydactyly    |                                                                                                                                 |
|               |                           |         | Liebenberg syndrome         |                                                                                                                                 |
|               |                           |         | CP                          |                                                                                                                                 |
| <b>Pou3f3</b> | Pou domain, class 3       | *602480 | n.r.                        | Absent squamosal bone and zygomatic bone, abnormal morphology of temporal styloid process, jaw, incus, and stapes <sup>21</sup> |
| <b>Rhox4b</b> | reproductive homeobox 4B  | n.r.    | n.r.                        | n.r.                                                                                                                            |
| <b>Shox2</b>  | short stature homeobox 2  | *602504 | n.r.                        | CP <sup>22</sup>                                                                                                                |
| <b>Uncx</b>   | UNC homeobox              | n.r.    | n.r.                        | n.r.                                                                                                                            |
| <b>Zeb2/</b>  | zinc finger E-box binding | *235730 | Mowat-Wilson syndrome       | Absent first pharyngeal arch <sup>23</sup>                                                                                      |
| <b>Zfmx1b</b> | homeobox 2                |         | CL/P, submucous CP          |                                                                                                                                 |
| <b>Zfmx3/</b> | zinc finger homeobox 3    | *104155 | Prostate cancer             | n.r., complete prenatal lethality <sup>24</sup>                                                                                 |
| <b>Atbf1</b>  |                           |         | Acute myocardial infarction |                                                                                                                                 |

---

OMIM, Online Mendelian Inheritance in Man (<http://omim.org>); n.r., not reported; CL/P, cleft lip and/or palate; CP, cleft palate.

## Supplementary Table S9. Primer sequences.

|                      | Primer Sequence (Sense)                 | Primer Sequence (Antisense)          |
|----------------------|-----------------------------------------|--------------------------------------|
| <b><i>Aix3</i></b>   | 5'-cgt gag cgt tat ggg aag at-3'        | 5'-aaa ggg ttt gct gtt tgg tg-3'     |
| <b><i>Atf4</i></b>   | 5'-ctc atg ggg cct tta gga cg-3'        | 5'-ggg cga agg ggg aca tca ag-3'     |
| <b><i>Dner</i></b>   | 5'-tgc gaa ctg tac aag gac cc-3'        | 5'-ggc cga gac ttc ttc cca aa-3'     |
| <b><i>Fli1</i></b>   | 5'-gtc aga cca cca gac caa gg-3'        | 5'-cag gag agt gcc tcg tgt g-3'      |
| <b><i>Hand2</i></b>  | 5'-cac cag cta cat cgc cta cc-3'        | 5'-cct tac cac acg gga gtg tc-3'     |
| <b><i>HIF1a</i></b>  | 5'-cga gaa cga gaa gaa aaa gat gag-3'   | 5'-ttg atg ttc atc gtc ctc ccc-3'    |
| <b><i>Hmx1</i></b>   | 5'-gaa gag gaa gag gac gac ga-3'        | 5'-gac tcg agc tgg aag acc tg-3'     |
| <b><i>Hmx1</i></b>   | 5'-tcg atc tga agc gct acc tg-3'        | 5'-ctt tcc atc gga acg ggt ct-3'     |
| <b><i>Hmx2</i></b>   | 5'-ctc cag ctt cac cat cca gt-3'        | 5'-tca ggt agc gtt tca tgt cg-3'     |
| <b><i>Hoxa5</i></b>  | 5'-ggc tac aat ggc atg gat ct-3'        | 5'-tgg gcc acc tat att gtc gt-3'     |
| <b><i>Hoxd1</i></b>  | 5'-cag cac ttt cga gtg gat ga-3'        | 5'-tat tca aag gtg ggg agc ag-3'     |
| <b><i>Irx5</i></b>   | 5'-cac cct tat gca gca cct ct-3'        | 5'-tcg gag gac gac tcc tta aa-3'     |
| <b><i>Isl1</i></b>   | 5'-tca tcc gag tgt ggt ttc aa-3'        | 5'-ttc cca ctt tct cca aca gg-3'     |
| <b><i>Lhx8</i></b>   | 5'-act gca tgc tgg aca atc tg-3'        | 5'-ttg ttg gtg agc atc cat gt-3'     |
| <b><i>Pax3</i></b>   | 5'-ctt ttt cgt ctc gcc ttc ac-3'        | 5'-aga cag cgt cct tga gca at-3'     |
| <b><i>Pax9</i></b>   | 5'-tat tct gcg caa caa gat cg-3'        | 5'-ttg ggc tgg tgt agg gta ag-3'     |
| <b><i>Pbx1</i></b>   | 5'-gca tca tcc acc gca agt tc-3'        | 5'-ctt cca gaa gtc agg cca cg-3'     |
| <b><i>Pcgf5</i></b>  | 5'-acc agg atg ccc cag act at-3'        | 5'-tgt tct cgt agt cca gcc ac-3'     |
| <b><i>Pdx1</i></b>   | 5'-gag ctg gca gtg atg ttg aa-3'        | 5'-tct ccg gct ata ccc aac tg-3'     |
| <b><i>Pitx1</i></b>  | 5'-gtg cag agg acc cag cta ag-3'        | 5'-ggc atg gtc atg gaa gag at-3'     |
| <b><i>Pou3f3</i></b> | 5'-caa aca aaa ccg gaa gag ga-3'        | 5'-ttt act gcg gag gat gct tt-3'     |
| <b><i>Rb1cc1</i></b> | 5'-aca cta aag gaa aag cat cag ca-3'    | 5'-tgt ggt ctg tca taa cgt ttc tc-3' |
| <b><i>Rhox4b</i></b> | 5'-cct cag gaa ctc cga ctc ag-3'        | 5'-tgc cac cat tgg aaa ttg ta-3'     |
| <b><i>Rsf1</i></b>   | 5'-gtg gac act tac tgg ctt gtt aaa t-3' | 5'-agc ata cat gtg gtc ttg gc-3'     |
| <b><i>Runx1</i></b>  | 5'-cac ttc cat cct gag ctc cc-3'        | 5'-ttc gga agt cag cca ctg tc-3'     |
| <b><i>Sfmbt2</i></b> | 5'-agt gtg gct cag gca gat tt-3'        | 5'-tgg cta ctt agg gaa gcg tg-3'     |
| <b><i>Shox2</i></b>  | 5'-ctg ccc cat tga tgt gtt att-3'       | 5'-cct cct cct cca gca cct-3'        |
| <b><i>Six4</i></b>   | 5'-cct agt gcc cct gtg tca tt-3'        | 5'-gcc ttc ctg ttt cac agc tc-3'     |
| <b><i>Uncx</i></b>   | 5'-cta ccc gga cgt gtt tat gc-3'        | 5'-ctt ctt tgg ctc ggg tag aa-3'     |
| <b><i>Zeb2</i></b>   | 5'-ccc aga gag aaa ctt ggc ga-3'        | 5'-cct cct ggg att ggc ttg tt-3'     |
| <b><i>Zfhx3</i></b>  | 5'-ggg gta cgg agg ctt tgt gt-3'        | 5'-cag gtt ctc cac atc gct ct-3'     |

## Supplementary Figures

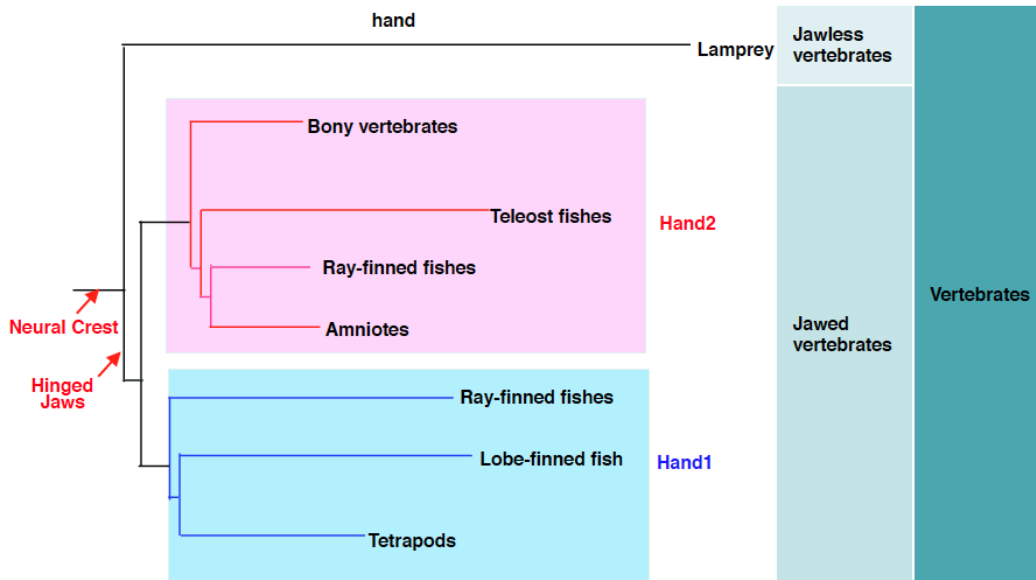

**Supplementary Figure S1. Rooted phylogenetic tree of Hand proteins.**

The rooted phylogenetic tree of Hand proteins was generated with Ensembl.



|                   |                                                   |                                                                   |     |
|-------------------|---------------------------------------------------|-------------------------------------------------------------------|-----|
| Jawed vertebrates | Elephant_shark_hand2                              | MSLVGGFPHHPVVHHEG - YPFAAAAAAAAAA - - - - - RCHEESPYFHGWL I SH    | 44  |
|                   | Xenopus_tropicalis_hand2                          | MSLVGGFPHHPVVHHDG YPFAAAAAAAAAA - - - - - RCHEENPYFHGWL I SH      | 45  |
|                   | Mouse_Hand2                                       | MSLVGGFPHHPVVHHEG YPFAAAAAAAAAAASRC SHEENPYFHGWL I GH             | 50  |
|                   | Human_HAND2                                       | MSLVGGFPHHPVVHHEG YPFAAAAAAAAAAASRC SHEENPYFHGWL I GH             | 50  |
|                   | Zebra_finch_hand2                                 | MSLVGGFPHHPVVHHEG YPFAAAAAAAAAAATRCGHEENPYFHGWL I SSH             | 50  |
|                   | Chicken_hand2                                     | MSLVGGFPHHPVVHHEG YPLRRRRRCRRRRRHPLRPRGE - PLLHGWL I SSH          | 49  |
|                   | Zebrafish_hand2                                   | MSLVGGFPHHPVVHHDG YSFAAAAAA SRC - - - - - HEEPPYFHGWL I SH        | 43  |
|                   | Medaka_hand2                                      | MSLVGGFPHHPAMHHHEGHHYSLR - - - - - HEDPGGAPYFTSWL I SH            | 41  |
|                   | Stickleback_hand2                                 | MSLVGGFPHHPVMHHHDSHHYSLHA - - - - - AAAGRCHETGAPPYFTSWL I SH      | 48  |
|                   | Tetraodon_hand2                                   | MSL ASGLSRHPVMH PHDGHSYSQN - - - - - AAGRQHEKPRAPSY I SWL I NQ    | 46  |
|                   | Cod_hand2                                         | MSLVGGFPHHPVMHHHDSHYSFHA - - - - - AAGRCHETGGPPYFTSWL I SH        | 46  |
|                   | Fruitfly_hand                                     | MFKNSVALTCEYSTMYNS - - - - - - - - - - - IYNT                     | 23  |
|                   | Lamprey_JL1799                                    | MQVSEAAAVHGGGGGGGGGGGGVGAAGVGGGGVGGG                              | 36  |
| C.elegans_hand    | MLMED                                             | 5                                                                 |     |
| Jawed vertebrates | Elephant_shark_hand2                              | AEMSPDDYSMAPSYSPYVNG - - - - - AAGLDHSAYGGVSA - - - - -           | 79  |
|                   | Xenopus_tropicalis_hand2                          | PEMSPDDYSMAPSYSPYANG - - - - - AAGLDHSHYGGVPG - - - - -           | 80  |
|                   | Mouse_Hand2                                       | PEMSPDDYSMALSYSPYASG - - - - - AAGLDHSHYGGVP - - - - -            | 84  |
|                   | Human_HAND2                                       | PEMSPDDYSMALSYSPYASG - - - - - AAGLDHSHYGGVP - - - - -            | 84  |
|                   | Zebra_finch_hand2                                 | PEMSPDDYSMALSYSPYANG - - - - - APGMDHSHYGGVP - - - - -            | 84  |
|                   | Chicken_hand2                                     | PEMSPDDYSMALSYSPYANG - - - - - APGMDHSHYGGVP - - - - -            | 83  |
|                   | Zebrafish_hand2                                   | PEMSPDDYTMAPSYSPYSTG - - - - - APGLDHSYGGVPG - - - - -            | 78  |
|                   | Medaka_hand2                                      | ADMSAAEYGLAPGYSPEYHGG - GGGAGGLDPHHHHYGASG - - - - -              | 81  |
|                   | Stickleback_hand2                                 | ADMSPT EYSLAPSYSPYHGN SGGGSAGGMDPHHHHHHYGPGGLVPGAG                | 98  |
|                   | Tetraodon_hand2                                   | ADMSL TEYSPTPGYSPDYNVNSGSDSTCLPDSQPYGTG - - - - -                 | 87  |
|                   | Cod_hand2                                         | ADMSPTDYALAPGYSPEYLGN - - - - - GSAVGLDPHHHYVGLVPAG - - - - -     | 87  |
|                   | Fruitfly_hand                                     | SNMFDMKHSESQVQQQ IYNTS - - - - - HLGYP - - - - -                  | 50  |
|                   | Lamprey_JL1799                                    | GA INGGAVATTA TAAAAAAA - - - - - - - - - - -                      | 57  |
| C.elegans_hand    | GGLD TTSEEYRKL SKAERRKR - - - - - - - - - - -     | 26                                                                |     |
| Jawed vertebrates | Elephant_shark_hand2                              | - - - - - AA AVAAVASGVRPPKRRGT ANRKERRRTQS INSAFAELREC I P        | 122 |
|                   | Xenopus_tropicalis_hand2                          | - - - - - SGAGGLMQR - - - - - PVKRRGT ANRKERRRTQS INSAFAELREC I P | 120 |
|                   | Mouse_Hand2                                       | - - - - - PGAGPPLGGPRPVKRRGT ANRKERRRTQS INSAFAELREC I P          | 127 |
|                   | Human_HAND2                                       | - - - - - PGAGPPLGGPRPVKRRGT ANRKERRRTQS INSAFAELREC I P          | 127 |
|                   | Zebra_finch_hand2                                 | - - - - - PGNGPPLGGPRPVKRRGT ANRKERRRTQS INSAFAELREC I P          | 127 |
|                   | Chicken_hand2                                     | - - - - - PGSGPPLGGPRPVKRRGT ANRKERRRTQS INSAFAELREC I P          | 126 |
|                   | Zebrafish_hand2                                   | - - - - - AGAVG - - - - - MGPRTVKRRPT ANRKERRRTQS INSAFAELREC I P | 118 |
|                   | Medaka_hand2                                      | - - - - - LMPGSVNGAAAHSHPRTVKRRPT ANRKERRRTQS INSAFAELREC I P     | 129 |
|                   | Stickleback_hand2                                 | P I SVNGTTVGMHPHHTHPRPVKRRPT ANRKERRRTQS INSAFAELREC I P          | 148 |
|                   | Tetraodon_hand2                                   | - - - - - AGDGG I SHRSV KRRPT ANRKERRRTQS INSAFAELRDC I P         | 128 |
|                   | Cod_hand2                                         | - - - - - I SVNGSTGMHHHTHPRPVKRRPT ANRKERRRTQS INSAFAELREC I P    | 134 |
|                   | Fruitfly_hand                                     | - - - - - TSNTR I V KKRNTANKERRRTQS INN AFSYLRK I P               | 86  |
|                   | Lamprey_JL1799                                    | - - - - - AAAYCGALRGLGERAERRRTQS INSAFAELRGI P                    | 92  |
| C.elegans_hand    | - - - - - RRATP - KYRNLHATRER I RVESFNMAFSQLRALLP | 60                                                                |     |
| Jawed vertebrates | Elephant_shark_hand2                              | NVPADTKLSK I KTLRLATS Y IAYLMDLLAK - DDQNGETEAFKAE I KKT DV       | 171 |
|                   | Xenopus_tropicalis_hand2                          | NVPADTKLSK I KTLRLATS Y IAYLMDLLAK - DDQNGETEAFKAE I KKT DV       | 169 |
|                   | Mouse_Hand2                                       | NVPADTKLSK I KTLRLATS Y IAYLMDLLAK - DDQNGEAEAFKAE I KKT DV       | 176 |
|                   | Human_HAND2                                       | NVPADTKLSK I KTLRLATS Y IAYLMDLLAK - DDQNGEAEAFKAE I KKT DV       | 176 |
|                   | Zebra_finch_hand2                                 | NVPADTKLSK I KTLRLATS Y IAYLMDLLAK - DDQNGEAEAFKAE I KKT DV       | 176 |
|                   | Chicken_hand2                                     | NVPADTKLSK I KTLRLATS Y IAYLMDLLPK - DDQNGEAEAFKAE I KKT DV       | 175 |
|                   | Zebrafish_hand2                                   | NVPADTKLSK I KTLRLATS Y IAYLMD I LDK - DEQNGGTEAFKAEFKKTD A       | 167 |
|                   | Medaka_hand2                                      | NVPADTKLSK I KTLRLATS Y IAYLMD I LDK - DGQHGDAQAFKADLKKTEA        | 178 |
|                   | Stickleback_hand2                                 | NVPADTKLSK I KTLRLATS Y IAYLMD I LDK - DGQGGDTLAFKAE LKKTEA       | 197 |
|                   | Tetraodon_hand2                                   | NVPADTKLSK I KTLRLATS Y IAYLMD I LDK - DGQHGTEAFKAEFKKTD G        | 167 |
|                   | Cod_hand2                                         | NVPADTKLSK I KTLRLATS Y IAYLMD I LDK - DGQHGTEAFKAEFKKTD G        | 183 |
|                   | Fruitfly_hand                                     | NVPTDKLSK I KTLKLA I L I N YLVNVL D G - DLD - - PKGGFRAEL KPVSR   | 133 |
|                   | Lamprey_JL1799                                    | NVPVDTKLSK I KTLRLATS Y IAYLMD V LDKGDSGGET TSGFRADLADSDG         | 142 |
| C.elegans_hand    | TL PVEKKLSK I E I L RFS I AY I SFLDNL L Q         | 89                                                                |     |
| Jawed vertebrates | Elephant_shark_hand2                              | KEEKRKRELNEVLKNT - - - - - VSSNDKKTGRTGWPQH VVALEL KQ             | 212 |
|                   | Xenopus_tropicalis_hand2                          | KEEKRKRELNEVLKST - - - - - VCSNDKKTGRTGWPQH VVALEL KQ             | 210 |
|                   | Mouse_Hand2                                       | KEEKRKRELNE I LKST - - - - - VSSNDKKTGRTGWPQH VVALEL KQ           | 217 |
|                   | Human_HAND2                                       | KEEKRKRELNE I LKST - - - - - VSSNDKKTGRTGWPQH VVALEL KQ           | 217 |
|                   | Zebra_finch_hand2                                 | KEEKRKRELNE I LKST - - - - - VSSNDKKTGRTGWPQH VVALEL KQ           | 217 |
|                   | Chicken_hand2                                     | KEEKRKRELNE I LKST - - - - - VSSNDKKTGRTGWPQH VVALEL KQ           | 216 |
|                   | Zebrafish_hand2                                   | KEERKKEMNDV LKSS - - - - - GSSNDKKTGRTGWPQH VVALEL KQ             | 208 |
|                   | Medaka_hand2                                      | REERRKRD AOGTGF                                                   | 192 |
|                   | Stickleback_hand2                                 | REERRKREAVE I PKT T LSSSSSSSSS SASDKKSKGRTGWPQH VVALEL KQ         | 247 |
|                   | Cod_hand2                                         | KEERRKREAVEVLKTP - - - - - SSTVGD KKTGRTGWPQH VVALEL KQ           | 225 |
|                   | Fruitfly_hand                                     | K I CSEK K HCL KSE I QN - - - - - VPLSTKGR TGWPQDVVA SEL I P      | 171 |
|                   | Lamprey_JL1799                                    | RSERAVDGT VRAHARAGVAQALGTRHGKRD SVEVEDLNSLHGTER I HLCV            | 192 |

## Supplementary Figure S2. Amino-acid alignment of Hand2.

The multiple sequence alignments of Hand2 orthologs were generated with ClustalW. The basic helix-loop-helix (bHLH) domain is shown with red boxes. The Hand2 amino sequences are conserved in jawed vertebrates but not in jawless vertebrates and invertebrates.

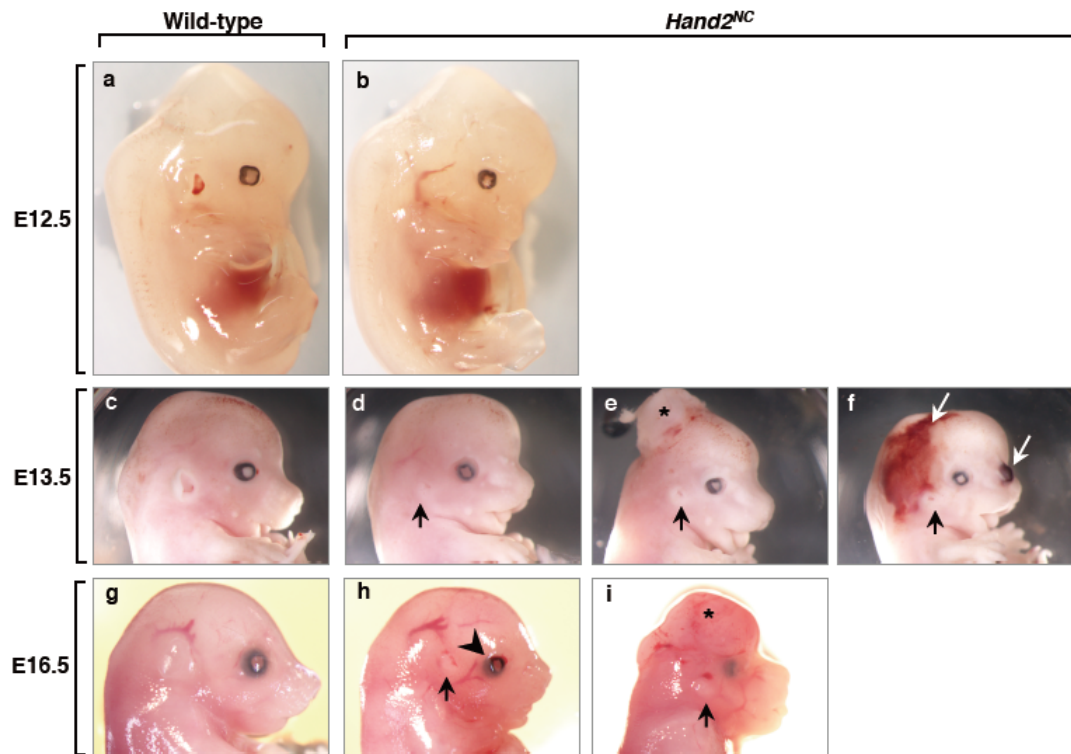

| Phenotypes |                                                                                             |            |
|------------|---------------------------------------------------------------------------------------------|------------|
| E12.5      | brachycephaly, tongue protrusion                                                            |            |
| E13.5      | Inadequate pigmentation in the ventral retina, small ears, brachycephaly, tongue protrusion |            |
|            | exencephaly                                                                                 | hemorrhage |
| E16.5      | open eyelids, small ears, small eye, brachycephaly, tongue protrusion                       |            |
|            | exencephaly                                                                                 |            |

**Supplementary Figure S3. Phenotype of *Hand2<sup>NC</sup>* embryos at E12.5, E13.5, and E16.5.**

Representative surface appearance of *Hand2<sup>NC</sup>* embryos at E12.5 (a,b), E13.5 (c–f), and E16.5 (g–i). Note the small ears (black arrows), exencephaly (asterisks), and hemorrhage (white arrows) in *Hand2<sup>NC</sup>* mutants at E13.5 (d,e,f) and E16.5 (h,i). An arrowhead indicates open eyelids (h).

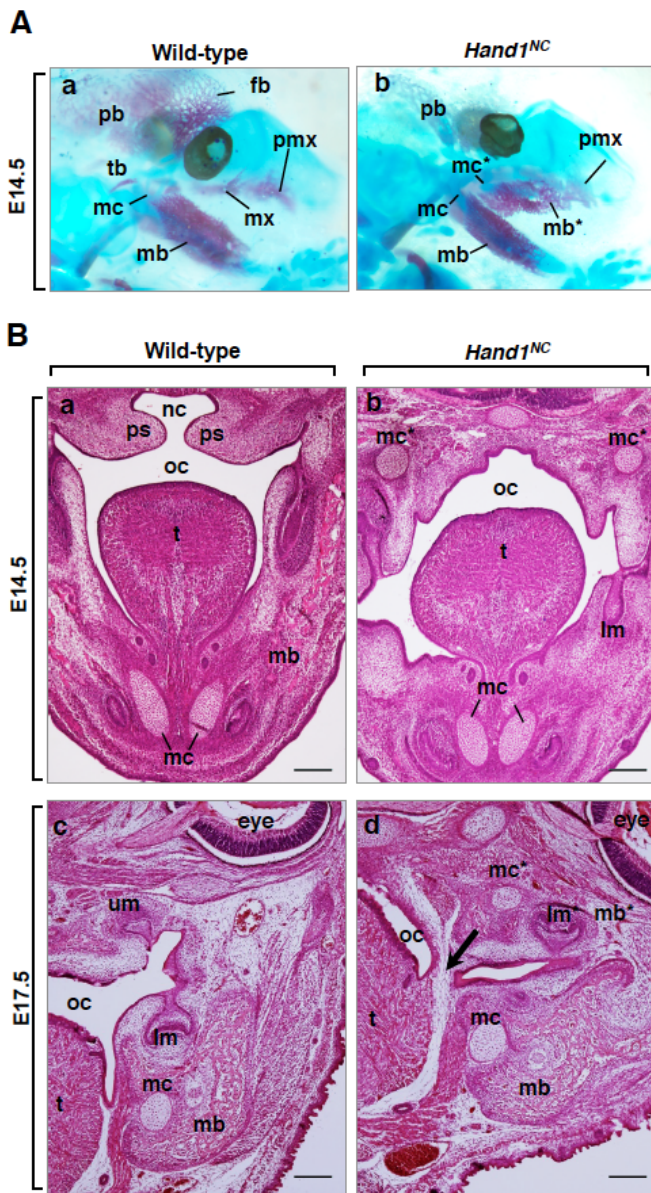

**Supplementary Figure S4.**

**Morphological transformation of the maxillary to mandibular process in *Hand1<sup>NC</sup>* mutants.**

(A) Skeletal preparations from wild-type (a) and *Hand1<sup>NC</sup>* (b) embryos at E14.5. The mutant maxilla (mx) is transformed to partially duplicated mandibular bone (mb\*) that is associated with duplicated Meckel's cartilage (mc\*). (B) H&E-stained coronal sections at E14.5 (a, b) and E17.5 (c, d) in wild-type (a, c) and *Hand1<sup>NC</sup>* (b, d) heads. Ectopic Meckel's cartilage (mc\*) and lower molar (lm\*) are observed in the duplicated mandible (mb\*). The original mandible of *Hand1<sup>NC</sup>* mutants is fused to the duplicated mandible by the connective tissue strings (arrow in d). Scale bars: 200  $\mu$ m. mb, mandibular bone; mc Meckel's

cartilage; fb, frontal bone; pb, parietal bone; pmx, premaxilla; tb, temporal bone; ps, palatal shelf; oc, oral cavity; nc, nasal cavity; um, upper molar; lm, lower molar; t, tongue.



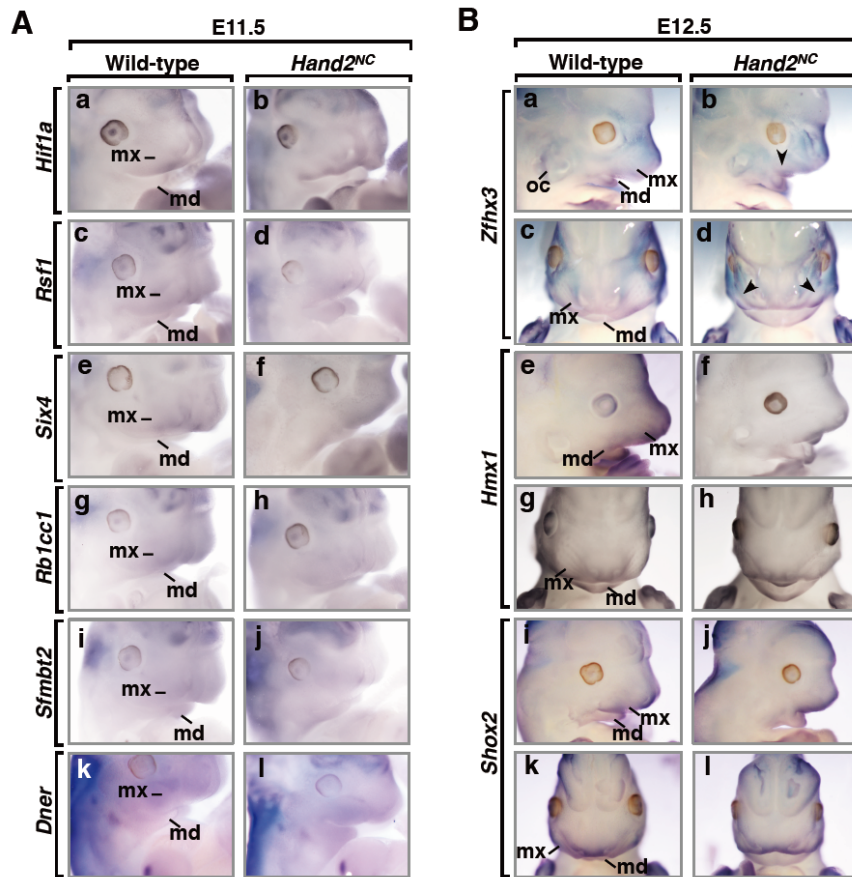

**Supplementary Figure S5. Gene expression analysis of the mandibular and maxillary processes resulting from altered *Hand2* expression.**

(A) The expression of transcription factors in the mandibular and maxillary processes at E11.5. Lateral views of wild-type and *Hand2<sup>NC</sup>* embryos processed by whole-mount *in situ* hybridization, as indicated. (B) Expression of homeobox transcription factors in the mandibular and maxillary process at E12.5. Lateral or frontal views of wild-type and *Hand2<sup>NC</sup>* embryos processed by whole-mount *in situ* hybridization, as indicated. Arrowheads indicate changes in gene expression. md, mandibular process; mx, maxillary process; oc, otic capsule.

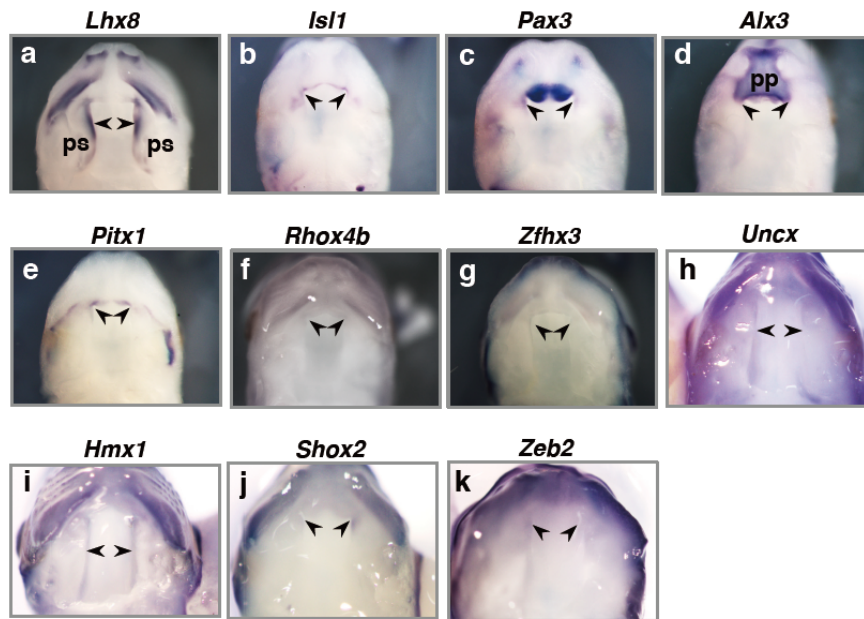

**Supplementary Figure S6. Expression of homeobox transcription factors in the palatal shelves at E12.5.**

Ventral views of the wild-type palatal shelves (ps) processed by whole-mount *in situ* hybridization, as indicated. Arrowheads indicate gene expression. ps, palatal shelf; pp, primary palate.

## Supplementary References

1. Yang, X. et al. ATF4 is a substrate of RSK2 and an essential regulator of osteoblast biology; implication for Coffin-Lowry Syndrome. *Cell* **117**, 387-398 (2004).
2. Yanagisawa, H., Clouthier, D.E., Richardson, J.A., Charite, J. & Olson, E.N. Targeted deletion of a branchial arch-specific enhancer reveals a role of dHAND in craniofacial development. *Development* **130**, 1069-1078 (2003).
3. Iyer, N.V. et al. Cellular and developmental control of O<sub>2</sub> homeostasis by hypoxia-inducible factor 1 alpha. *Genes Dev.* **12**, 149-162 (1998).
4. Meunier, D., Aubin, J. & Jeannotte, L. Perturbed thyroid morphology and transient hypothyroidism symptoms in Hoxa5 mutant mice. *Dev. Dyn.* **227**, 367-378 (2003).
5. Zakany, J., Kmita, M., Alarcon, P., de la Pompa, J.L. & Duboule, D. Localized and transient transcription of Hox genes suggests a link between patterning and the segmentation clock. *Cell* **106**, 207-217 (2001).
6. Selleri, L. et al. Requirement for Pbx1 in skeletal patterning and programming chondrocyte proliferation and differentiation. *Development* **128**, 3543-3557 (2001).
7. Ferretti, E. et al. A conserved Pbx-Wnt-p63-Irf6 regulatory module controls face morphogenesis by promoting epithelial apoptosis. *Dev. Cell* **21**, 627-641 (2011).
8. Ozaki, H. et al. Six4, a putative myogenin gene regulator, is not essential for mouse embryonal development. *Mol. Cell. Biol.* **21**, 3343-3350 (2001).
9. Lakhwani, S., Garcia-Sanz, P. & Vallejo, M. Alx3-deficient mice exhibit folic acid-resistant craniofacial midline and neural tube closure defects. *Dev. Biol.* **344**, 869-880 (2010).
10. Beverdam, A., Brouwer, A., Reijnen, M., Korving, J. & Meijlink, F. Severe nasal clefting and abnormal embryonic apoptosis in Alx3/Alx4 double mutant mice. *Development* **128**, 3975-3986 (2001).
11. Rivera-Perez, J.A., Mallo, M., Gendron-Maguire, M., Gridley, T. & Behringer, R.R. Goosecoid is not an essential component of the mouse gastrula organizer but is required for craniofacial and rib development. *Development* **121**, 3005-3012 (1995).
12. Yamada, G. et al. Targeted mutation of the murine goosecoid gene results in craniofacial defects and neonatal death. *Development* **121**, 2917-2922 (1995).
13. Munroe, R.J. et al. Mouse H6 Homeobox 1 (Hmx1) mutations cause cranial abnormalities and reduced body mass. *BMC Dev. Biol.* **9**, 27 (2009).
14. Wang, W., Chan, E.K., Baron, S., Van de Water, T. & Lufkin, T. Hmx2 homeobox gene control of murine vestibular morphogenesis. *Development* **128**, 5017-5029 (2001).
15. Cai, C.L. et al. Isl1 identifies a cardiac progenitor population that proliferates prior to differentiation and contributes a majority of cells to the heart. *Dev. Cell* **5**, 877-889 (2003).
16. Zhao, Y. et al. Isolated cleft palate in mice with a targeted mutation of the LIM homeobox gene *lhx8*. *Proc. Natl. Acad. Sci. USA* **96**, 15002-15006 (1999).
17. Peters, H., Neubuser, A., Kratochwil, K. & Balling, R. Pax9-deficient mice lack pharyngeal pouch derivatives and teeth and exhibit craniofacial and limb abnormalities. *Genes Dev.* **12**, 2735-2747 (1998).

18. Kist, R. et al. Reduction of Pax9 gene dosage in an allelic series of mouse mutants causes hypodontia and oligodontia. *Hum. Mol. Genet.* **14**, 3605-3617 (2005).
19. Szeto, D.P. et al. Role of the Bicoid-related homeodomain factor Pitx1 in specifying hindlimb morphogenesis and pituitary development. *Genes Dev.* **13**, 484-494 (1999).
20. Lanctot, C., Moreau, A., Chamberland, M., Tremblay, M.L. & Drouin, J. Hindlimb patterning and mandible development require the Ptx1 gene. *Development* **126**, 1805-1810 (1999).
21. Jeong, J. et al. Dlx genes pattern mammalian jaw primordium by regulating both lower jaw-specific and upper jaw-specific genetic programs. *Development* **135**, 2905-2916 (2008).
22. Yu, L. et al. Shox2-deficient mice exhibit a rare type of incomplete clefting of the secondary palate. *Development* **132**, 4397-4406 (2005).
23. Van de Putte, T. et al. Mice lacking ZFH1B, the gene that codes for Smad-interacting protein-1, reveal a role for multiple neural crest cell defects in the etiology of Hirschsprung disease-mental retardation syndrome. *Am. J. Hum. Genet.* **72**, 465-470 (2003).
24. Sun, X. et al. Heterozygous deletion of Atbf1 by the Cre-loxP system in mice causes preweaning mortality. *Genesis* **50**, 819-827 (2012).
